# Supplementary material
Source: PubMed Central journal article supplement (PMC8330328)
Supplement: NIHMS1728071-supplement-Supplemental_Table_S1.pdf [file NIHMS1728071-supplement-Supplemental_Table_S1.pdf]

**Supplementary Table S1** Sensitivity analysis randomly assigning participants with missing data on mode of delivery ( $n = 19$ ) to 1 spontaneous or induced vaginal delivery versus cesarean or 2 spontaneous vaginal versus induced vaginal or cesarean, with proportion assigned to each group ranging from 0 to 1.0 in intervals of 0.2

| Proportion assigned to cesarean delivery |         | Cesarean versus vaginal delivery |
|------------------------------------------|---------|----------------------------------|
| LDA                                      | Placebo | RR (95% CI)                      |
| 0                                        | 0       | 1.06 (0.81–1.39)                 |
| 0                                        | 0.2     | 1.03 (0.79–1.34)                 |
| 0                                        | 0.4     | 1.00 (0.77–1.30)                 |
| 0                                        | 0.6     | 0.97 (0.75–1.26)                 |
| 0                                        | 0.8     | 0.95 (0.73–1.23)                 |
| 0                                        | 1       | 0.92 (0.71–1.19)                 |
| 0.2                                      | 0       | 1.08 (0.83–1.41)                 |
| 0.2                                      | 0.2     | 1.05 (0.80–1.37)                 |
| 0.2                                      | 0.4     | 1.02 (0.78–1.33)                 |
| 0.2                                      | 0.6     | 0.99 (0.76–1.29)                 |
| 0.2                                      | 0.8     | 0.96 (0.74–1.25)                 |
| 0.2                                      | 1       | 0.94 (0.73–1.21)                 |
| 0.4                                      | 0       | 1.10 (0.84–1.44)                 |
| 0.4                                      | 0.2     | 1.07 (0.82–1.39)                 |
| 0.4                                      | 0.4     | 1.04 (0.80–1.35)                 |
| 0.4                                      | 0.6     | 1.01 (0.78–1.31)                 |
| 0.4                                      | 0.8     | 0.98 (0.76–1.27)                 |
| 0.4                                      | 1       | 0.96 (0.74–1.23)                 |
| 0.6                                      | 0       | 1.12 (0.86–1.46)                 |
| 0.6                                      | 0.2     | 1.09 (0.84–1.42)                 |
| 0.6                                      | 0.4     | 1.06 (0.82–1.37)                 |
| 0.6                                      | 0.6     | 1.03 (0.79–1.33)                 |
| 0.6                                      | 0.8     | 1.00 (0.78–1.29)                 |
| 0.6                                      | 1       | 0.97 (0.76–1.25)                 |
| 0.8                                      | 0       | 1.14 (0.88–1.49)                 |
| 0.8                                      | 0.2     | 1.11 (0.85–1.44)                 |
| 0.8                                      | 0.4     | 1.08 (0.83–1.39)                 |
| 0.8                                      | 0.6     | 1.05 (0.81–1.35)                 |
| 0.8                                      | 0.8     | 1.02 (0.79–1.31)                 |
| 0.8                                      | 1       | 0.99 (0.77–1.27)                 |
| 1                                        | 0       | 1.16 (0.89–1.51)                 |
| 1                                        | 0.2     | 1.13 (0.87–1.46)                 |
| 1                                        | 0.4     | 1.10 (0.85–1.42)                 |
| 1                                        | 0.6     | 1.07 (0.83–1.37)                 |
| 1                                        | 0.8     | 1.04 (0.81–1.33)                 |
| 1                                        | 1       | 1.01 (0.79–1.30)                 |

Abbreviations: CI, confidence interval; LDA, low-dose aspirin; RR, relative risk.
